# Supplementary material for: Effect of temperature on the structure and drug-release behaviour of inclusion complex of β-cyclodextrin with cyclophosphamide: a molecular dynamics study
Source: Royal Society of Chemistry journal article supplement (doi:10.1039/d2sm01542k), 2023-01-01
Supplement: d2sm01542k1.pdf [file d2sm01542k1.pdf]

## Supporting Information

### **Effect of temperature on the structure and drug-release behaviour of inclusion complex of $\beta$ -cyclodextrin with cyclophosphamide: A molecular dynamics study**

Seiga Sakai, Yoshinori Hirano, Yusei Kobayashi, and Noriyoshi Arai\*

Department of Mechanical Engineering, Keio University, Yokohama, Kanagawa 223-8522, Japan

\* E-mail: [arai@mech.keio.ac.jp](mailto:arai@mech.keio.ac.jp)

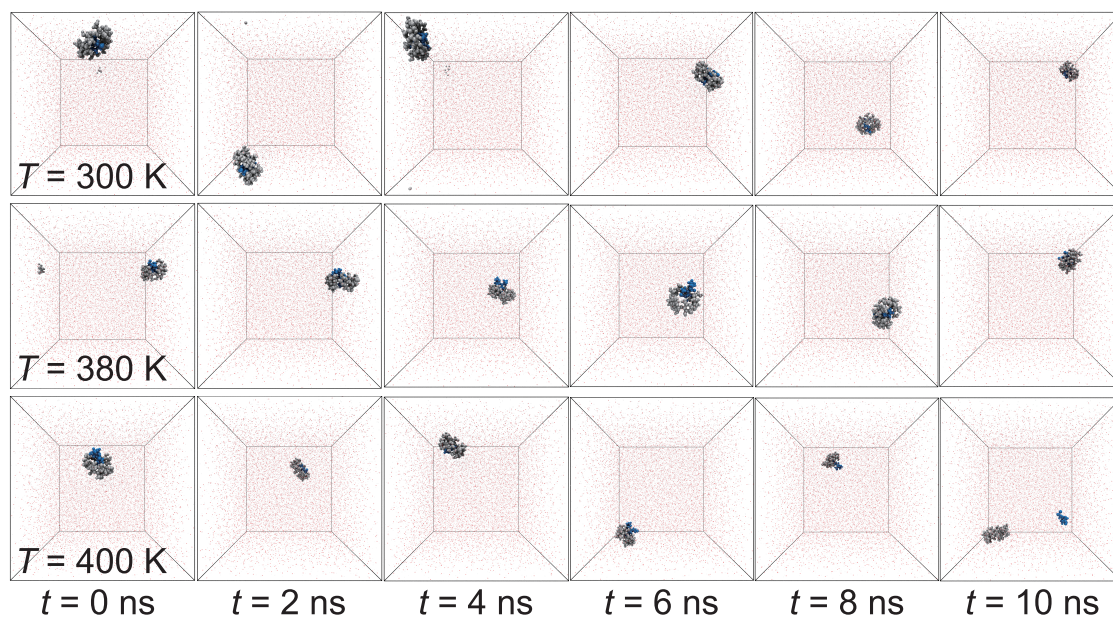

**Figure S1** Representative simulation snapshots for the behaviours of the  $\beta$ -CD/CP complex and drug release.

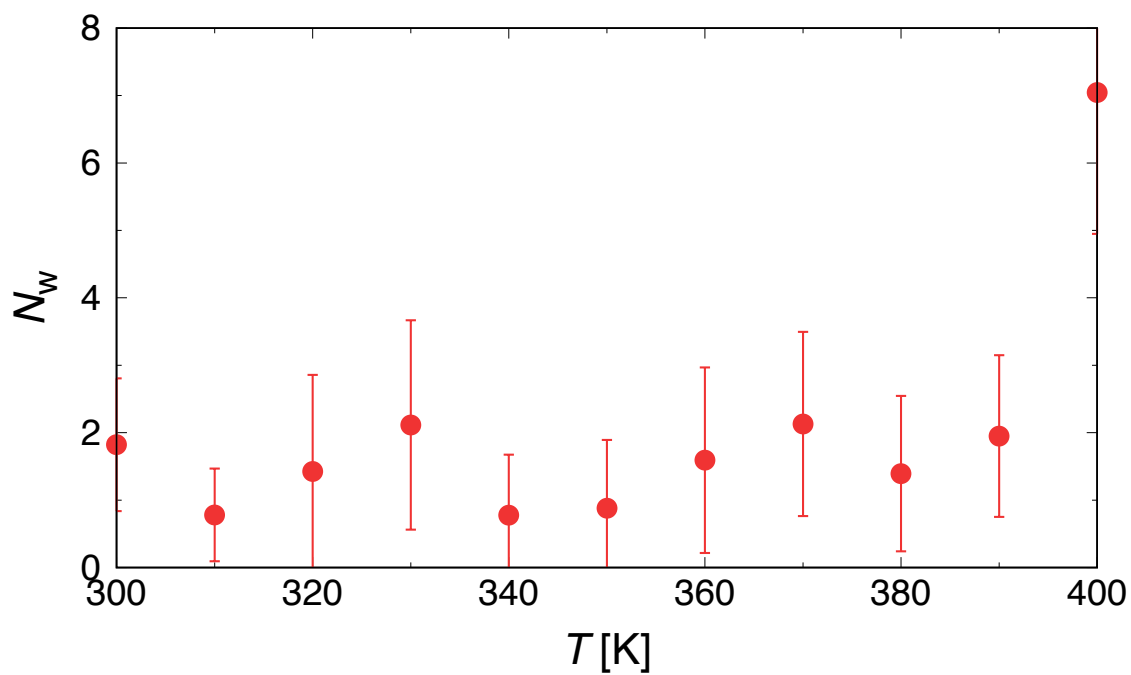

**Figure S2** Average number of water molecules,  $N_w$ , in the  $\beta$ -CD cavity.

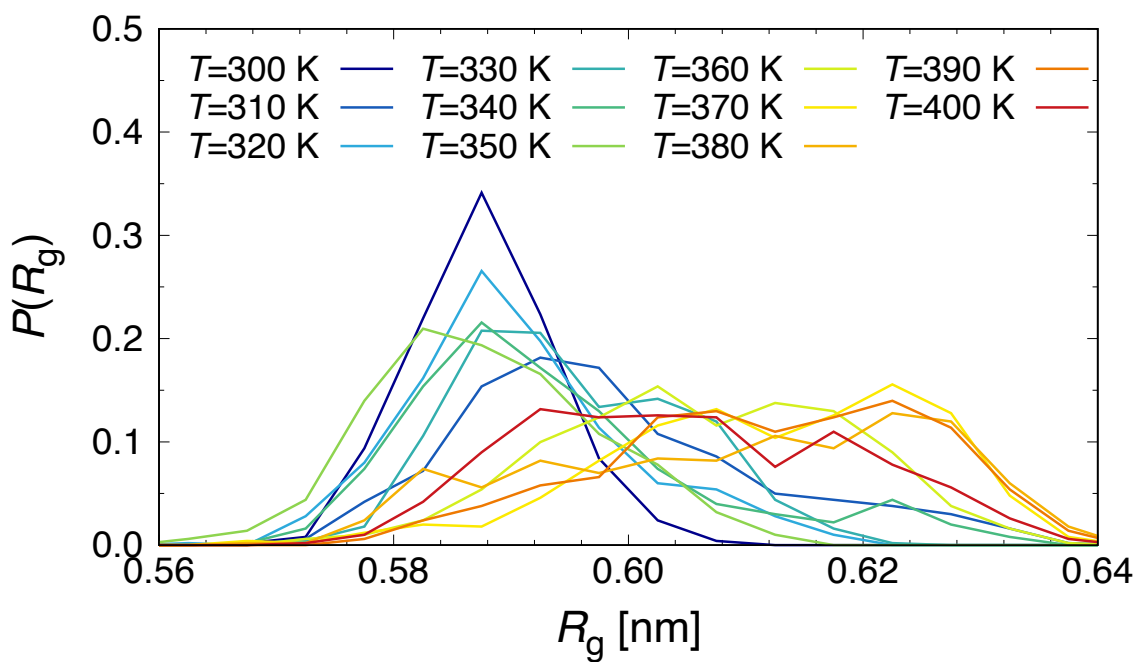

**Figure S3** Probability distribution of the radius of gyration,  $R_g$ , of  $\beta$ -CD,  $P(R_g)$  in the single-dispersion state for all investigated  $T$ , as indicated.
